# Supplementary material for: Microwave-assisted synthesis of Fe-based single-atom nanozyme: a colorimetric approach to detect Cr( vi )
Source: Royal Society of Chemistry journal article supplement (doi:10.1039/d5dt02062j), 2025-11-21
Supplement: d5dt02062j1.pdf [file d5dt02062j1.pdf]

1 **Supplementary Information**

2 **Microwave-Assisted Synthesis of Fe-based Single-Atom**  
3 **Nanozyme: A Colorimetric Approach to Detect Cr(VI)**

4 Zixiang Liao<sup>a</sup>, Yue Ren<sup>a</sup>, Bingzheng Yuan<sup>a</sup>, Libo Li<sup>a, \*</sup>, Tianyan You<sup>a, b, \*</sup>

5 <sup>a</sup> *Key Laboratory of Modern Agricultural Equipment and Technology, Ministry of*  
6 *Education, School of Agricultural Engineering, Jiangsu University, Zhenjiang,*  
7 *Jiangsu, 212013, China*

8 <sup>b</sup> *College of Agricultural Equipment Engineering, Henan University of Science and*  
9 *Technology, Luoyang, Henan, 471003, China*

10 \* Corresponding author. Fax/Tel: +86-511-88982992

11 E-mail: [lbli@ujs.edu.cn](mailto:lbli@ujs.edu.cn) (L. Li)

12 E-mail: [youty@ujs.edu.cn](mailto:youty@ujs.edu.cn) (T. You)

## 13 S1 Experiment Section

### 14 S1.1 Chemicals

15 Iron nitrate nonahydrate ( $\text{Fe}(\text{NO}_3)_3 \cdot 9\text{H}_2\text{O}$ ), zinc chloride ( $\text{ZnCl}_2$ ), 3,3',5,5'-  
16 tetramethyl-benzidine (TMB), isopropyl alcohol (IPA) and 2-methylimidazole(2-MI)  
17 were provided by Aladdin. Methyl alcohol, zinc nitrate hexahydrate ( $\text{Zn}_2(\text{NO}_3)_2 \cdot 6\text{H}_2\text{O}$ ),  
18 ethanol, potassium chloride (KCl), muriatic acid, glacial acetic acid, 30% hydrogen  
19 peroxide, potassium dichromate ( $\text{K}_2\text{Cr}_2\text{O}_7$ ), copper chloride dihydrate ( $\text{CuCl}_2 \cdot 2\text{H}_2\text{O}$ ),  
20 sodium chloride (NaCl), anhydrous calcium chloride ( $\text{CaCl}_2$ ) and magnesium chloride  
21 hexahydrate ( $\text{MgCl}_2 \cdot 6\text{H}_2\text{O}$ ) were obtained from Sinopharm Chemical Regent. 8-  
22 hydroxyquinoline (8-HQ), p-benzoquinone (PBQ), tryptophan (Trp), chromium  
23 chloride hexahydrate ( $\text{CrCl}_3$ ) and manganese chloride tetrahydrate ( $\text{MnCl}_2 \cdot 4\text{H}_2\text{O}$ ) were  
24 purchased from Macklin, Cadmium chloride hemihydrate ( $\text{CdCl}_2 \cdot 2.5\text{H}_2\text{O}$ ) and  
25 anhydrous sodium acetate manufactured by Sinopharm Shanghai Test.

### 26 S1.2 Apparatus

27 Microscopic morphologies of samples were characterized by focused ion beam-  
28 scanning electron microscopy (FIB-SEM) (Thermo, USA) and transmission electron  
29 microscopy (TEM) (Thermo, USA). X-ray photoelectron spectroscopy (XPS) (Thermo,  
30 USA) and X-ray absorption fine structure spectroscopy (XAFS) were conducted to  
31 explore the elemental composition and their chemical states. The peroxidase-like  
32 mechanism of Fe-N-C was verified by an Electron paramagnetic resonance (EPR)  
33 (Bruker, Germany) spectrometer Ultraviolet-visible (UV-Vis) (SHIMADZ, Japan)  
34 measurement was used to monitor the absorbance changes during the mimic enzyme

35 reaction process. Fluorescence (FL) (Edinburg, English) spectra was used to monitor  
36 the fluorescence changes during the mimic enzyme reaction process. Inductively  
37 coupled plasma optical emission spectrometer (ICP-OES) (Thermo, USA) was used to  
38 analyze Cr(VI) in environmental water samples.

### 39 **S1.3 Enzyme mimicking activity of Fe-N-C**

40 The oxidase-like catalytic activity of the Fe-N-C was assessed by the TMB color  
41 reaction. Briefly, 20  $\mu\text{L}$  of Fe-N-C (2.5 mg/mL) and 50  $\mu\text{L}$  of TMB (10 mM) were  
42 added to a 2mL centrifuge tube. This mixture was then diluted with 0.2 mol/L HAc-  
43 NaAc buffer (pH 4.5) to a final volume of 1 mL. The reaction was allowed to proceed  
44 for 5 min, and the absorbance at 652 nm was recorded. Similarly, the peroxidase-like  
45 catalytic activity of the Fe-N-C were investigated by adding 20  $\mu\text{L}$  of  $\text{H}_2\text{O}_2$  to the above  
46 reaction system while maintaining all other experimental conditions.

### 47 **S1.4 Kinetic analysis**

48 The experiments of kinetic parameters of the POD-like activity of Fe-N-C were  
49 carried out under their optimal conditions and the concentration of the corresponding  
50 substrate was changed in different enzymological active systems. The corresponding  
51 initial velocities were obtained through the operation of time scan and the results were  
52 calculated according to the Lineweaver-Burk equation:

$$53 \quad 1/v = (K_m/V_{\max}) \times (1/[C]) + 1/V_{\max} \quad (1)$$

54 Where  $v$  refers to the initial velocity,  $K_m$  and  $V_{\max}$  are the Michaelis-Menten constant  
55 and the maximum reaction velocity, respectively, and  $C$  is the substrate's  
56 concentration<sup>1, 2</sup>.

### 57 **S1.5 Colorimetric detection of Cr(VI) in real samples**

58 We selected Yangtze River samples to estimate the feasibility of Cr(VI) detection by  
59 the Fe-N-C colorimetric platform. The water source of the laboratory is taken as  
60 Yangtze River sample is treated with 0.2  $\mu\text{m}$  water filter to take out impurities. In order  
61 to ascertain the Cr(VI) concentration, spiked concentrations of Cr(VI) (20 and 50  $\mu\text{M}$ )  
62 were added to the above solution. The absorption spectra were recorded by the UV–  
63 visible after 5 min incubation at ambient temperature.

64 **S2 Results and discussions**

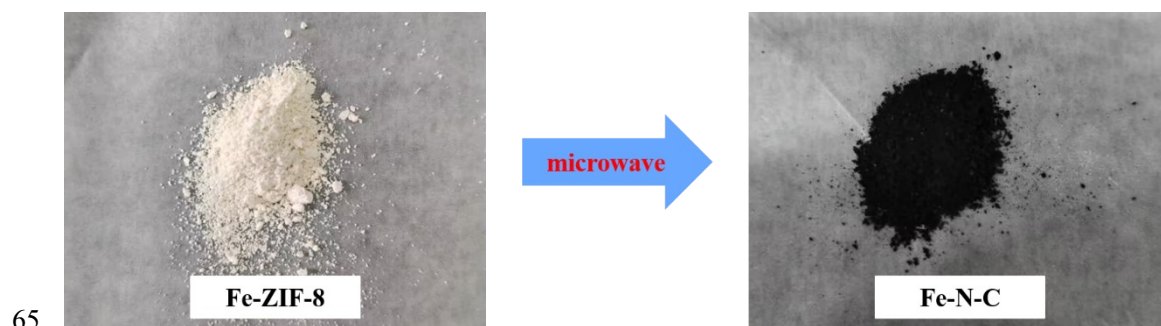

66 **Fig. S1.** Photographs of Fe-ZIF-8 and Fe-N-C.

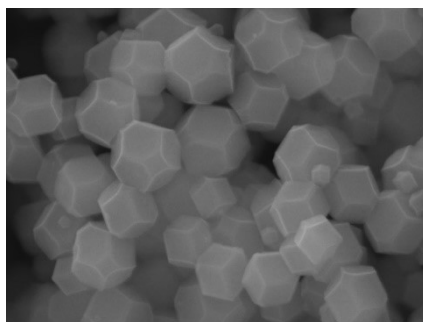

67

68 **Fig. S2.** SEM image of Fe-ZIF-8.

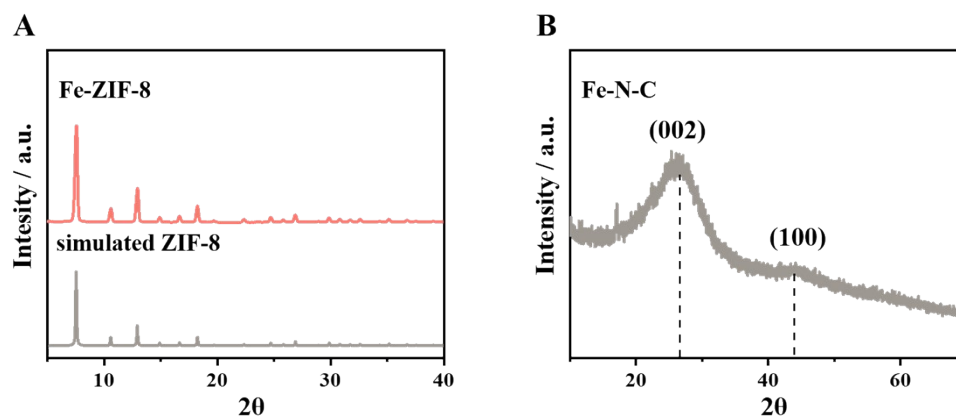

69

70 **Fig. S3.** Powder XRD patterns of (A) Fe-ZIF-8 and (B) Fe-N-C.

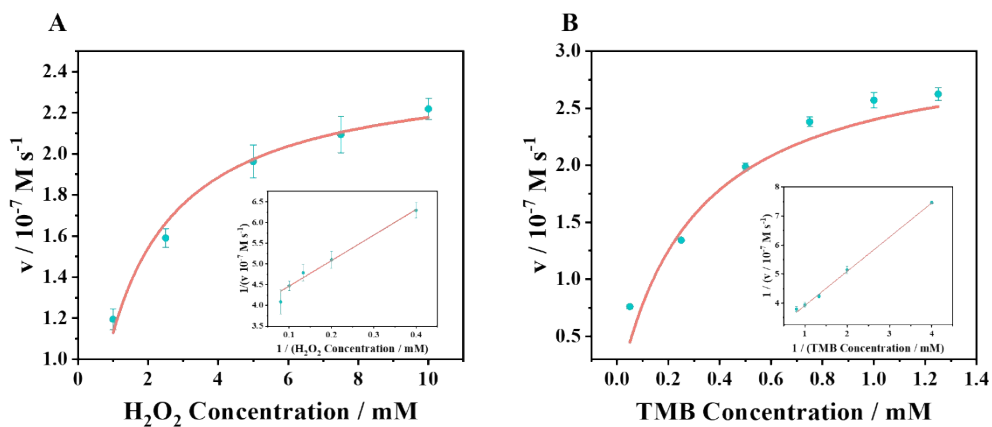

71

72 **Fig. S4.** (A) Kinetic curve and double-reciprocal plot of Fe-N-C with  $\text{H}_2\text{O}_2$  as a

73 substrate. (B) Kinetic curve and double-reciprocal plot of Fe-N-C with TMB as a

74 substrate.



75 **Table S1** Comparison of the kinetic parameters of the Fe-N-C and other nanozymes.

| Catalyst                            | Substrate                     | $K_m$<br>(mM) | $V_{max}$<br>( $10^{-8} \text{ M s}^{-1}$ ) | Ref.      |
|-------------------------------------|-------------------------------|---------------|---------------------------------------------|-----------|
| HRP                                 | H <sub>2</sub> O <sub>2</sub> | 3.70          | 8.71                                        | <b>3</b>  |
|                                     | TMB                           | 0.43          | 10.00                                       |           |
| f-FeNC                              | H <sub>2</sub> O <sub>2</sub> | 2.50          | 4.95                                        | <b>4</b>  |
|                                     | TMB                           | 0.15          | 3.61                                        |           |
| Fe-N-C                              | H <sub>2</sub> O <sub>2</sub> | 12.2          | 116.00                                      | <b>5</b>  |
|                                     | TMB                           | 3.6           | 35.60                                       |           |
| Fe SAEs                             | H <sub>2</sub> O <sub>2</sub> | 0.24          | 8.25                                        | <b>6</b>  |
|                                     | TMB                           | 3.92          | 58.80                                       |           |
| Mn <sub>SA</sub> -N <sub>3</sub> -C | H <sub>2</sub> O <sub>2</sub> | 1200          | 63.00                                       | <b>7</b>  |
|                                     | TMB                           | 0.54          | 63.00                                       |           |
| Cu-N-C                              | H <sub>2</sub> O <sub>2</sub> | 19.94         | 20.07                                       | <b>8</b>  |
|                                     | TMB                           | 3.76          | 75.05                                       |           |
| Fe-N-C                              | H <sub>2</sub> O <sub>2</sub> | 1.15          | 24.28                                       | This work |
|                                     | TMB                           | 0.29          | 31.13                                       |           |

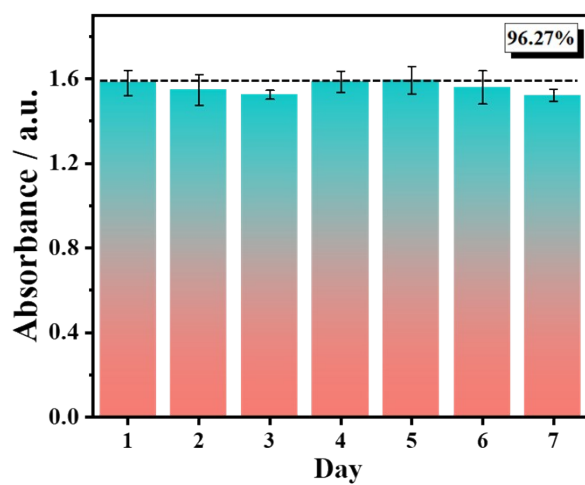

77

78 **Fig. S5.** POD activity of Fe-N-C in different days. (The ordinate is the absorbance of

79 Fe-N-C/TMB/H<sub>2</sub>O<sub>2</sub> system at the wavelength of 652 nm)

80

81

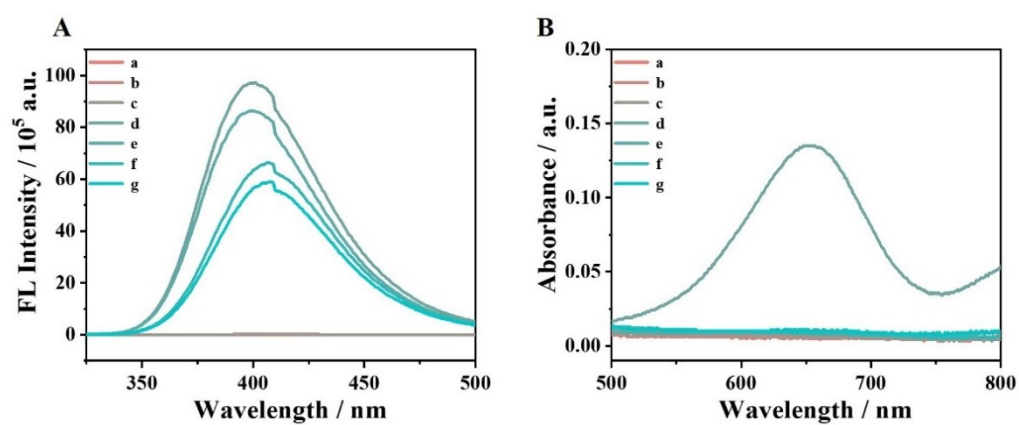

82

83 **Fig. S6.** (A) FL spectra and (B) UV spectra of a) H<sub>2</sub>O<sub>2</sub>, b) 8-HQ, c) H<sub>2</sub>O<sub>2</sub>+8-HQ, d)

84 TMB, e) TMB+H<sub>2</sub>O<sub>2</sub>, f) TMB+8-HQ, and g) TMB+H<sub>2</sub>O<sub>2</sub>+8-HQ.

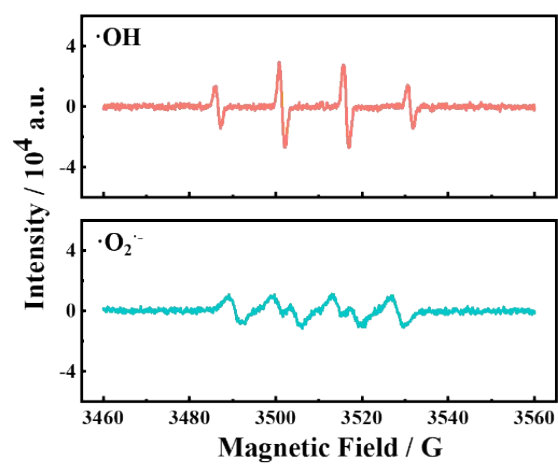

85

86 **Fig. S7.** EPR signals for  $\cdot\text{OH}$  and  $\cdot\text{O}_2\cdot^-$  detection of TMB/H<sub>2</sub>O<sub>2</sub>/8-HQ system.

87

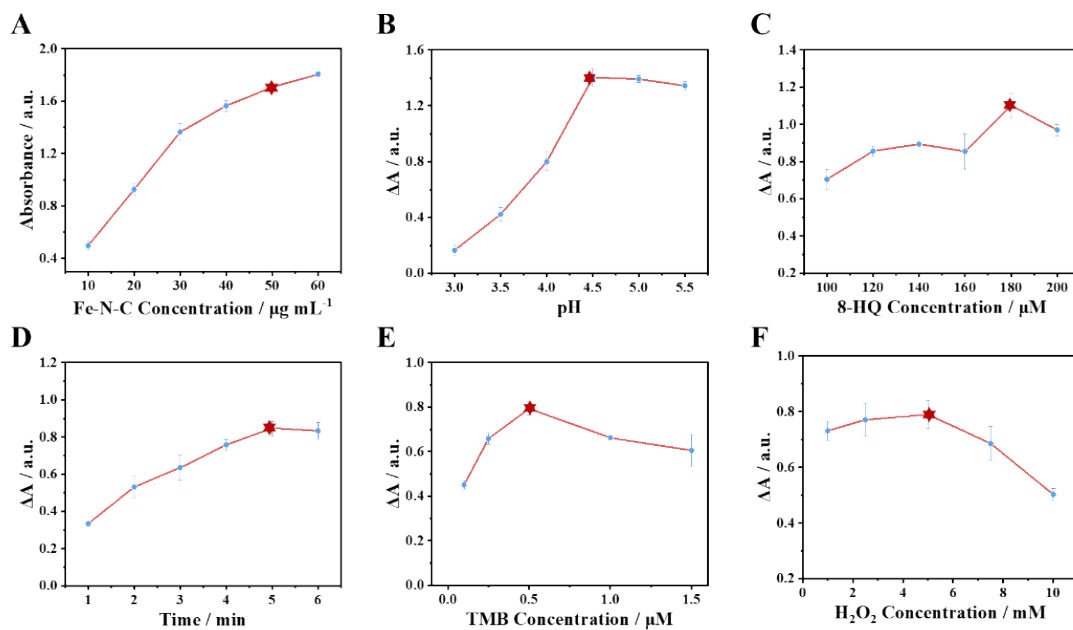

88

89 **Fig. S8.** The relationship between (A) Fe-N-C concentration, (B) pH value, (C) 8-HQ  
 90 concentration, (D) illumination time, (E) TMB concentration, (F)  $\text{H}_2\text{O}_2$  concentration  
 91 and  $\Delta A$  ( $\Delta A = A_0 - A$ , where  $A_0$  and  $A$  respectively represent the absorbance at 652 nm  
 92 of the TMB/ $\text{H}_2\text{O}_2$ /Fe-N-C system before and after adding 8-HQ).

93 **Table S2** The comparison of properties of different methods for Cr (VI) detection based  
 94 on different materials.

| System                               | Method       | Linear range<br>( $\mu\text{M}$ ) | LOD<br>( $\mu\text{M}$ ) | Refs      |
|--------------------------------------|--------------|-----------------------------------|--------------------------|-----------|
| CD/PVA                               | Fluorescence | 0~60                              | 0.64                     | <b>9</b>  |
| KCQDs@SBA-15                         | Fluorescence | 0~100                             | 0.866                    | <b>10</b> |
| PEI-AgNCs                            | Colorimetry  | 5~300                             | 1.1                      | <b>11</b> |
| Cu-PyC MOF                           | Colorimetry  | 0.5~50                            | 0.051                    | <b>12</b> |
| GO/AuNPs                             | Colorimetry  | 0.1~15                            | 0.153                    | <b>13</b> |
| H-Fe-POP                             | Colorimetry  | 2~130                             | 0.23                     | <b>14</b> |
| Fe <sub>3</sub> O <sub>4</sub> @MQDs | Colorimetry  | 0~60                              | 0.26                     | <b>15</b> |
| Fe-N-C                               | Colorimetry  | 1~130                             | 0.13                     | This work |

## 96 References

- 97 1. H. Ye, K. Yang, J. Tao, Y. Liu, Q. Zhang, S. Habibi, Z. Nie and X. Xia, *ACS Nano*,  
98 2017, **11**, 2052-2059.
- 99 2. Y. Wang, T. Li and H. Wei, *Anal. Chem.*, 2023, **95**, 10105-10109.
- 100 3. L. Gao, J. Zhuang, L. Nie, J. Zhang, Y. Zhang, N. Gu, T. Wang, J. Feng, D. Yang,  
101 S. Perrett and X. Yan, *Nat. Nanotechnol.*, 2007, **2**, 577-583.
- 102 4. C. Zhang, C. Chen, D. Zhao, G. Kang, F. Liu, F. Yang, Y. Lu and J. Sun, *Anal.*  
103 *Chem.*, 2022, **94**, 3485-3493.
- 104 5. L. Jiao, W. Xu, H. Yan, Y. Wu, C. Liu, D. Du, Y. Lin and C. Zhu, *Anal. Chem.*,  
105 2019, **91**, 11994-11999.
- 106 6. C. Zhao, C. Xiong, X. Liu, M. Qiao, Z. Li, T. Yuan, J. Wang, Y. Qu, X. Wang, F.  
107 Zhou, Q. Xu, S. Wang, M. Chen, W. Wang, Y. Li, T. Yao, Y. Wu and Y. Li, *Chem.*  
108 *Commun.*, 2019, **55**, 2285-2288.
- 109 7. Y. Wang, A. Cho, G. Jia, X. Cui, J. Shin, I. Nam, K.-J. Noh, B. J. Park, R. Huang  
110 and J. W. Han, *Angew. Chem. Int. Ed.*, 2023, **62**, e202300119.
- 111 8. Y. Wu, J. Wu, L. Jiao, W. Xu, H. Wang, X. Wei, W. Gu, G. Ren, N. Zhang, Q.  
112 Zhang, L. Huang, L. Gu and C. Zhu, *Anal. Chem.*, 2020, **92**, 3373-3379.
- 113 9. Y. Chen, H. Cui, M. Wang, X. Yang and S. Pang, *Colloids and Surfaces A:*  
114 *Physicochemical and Engineering Aspects*, 2022, **638**, 128164.
- 115 10. C. Jing, Z. Liu, S. Liu, B. Li, X. Li, J. Hu and B. Wang, *Microchem. J.*, 2024, **201**,  
116 110726.
- 117 11. Q. Xue, X. Li, Y. Peng, P. Liu, H. Peng and X. Niu, *Microchimica Acta*, 2020,

118        **187**, 263.

119    12. S. Kulandaivel, W. Lo, C. Lin and Y. Yeh, *Anal. Chim. Acta*, 2022, **1227**, 340335.

120    13. Y. Qi, B. Li, D. Song, F. Xiu and X. Gao, *Spectrochimica Acta Part A: Molecular*  
121        *and Biomolecular Spectroscopy*, 2023, **297**, 122722.

122    14. L. Zhu, F. Yang, C. Lou, X. Zhang and Y. Yang, *Microchimica Acta*, 2023, **190**,  
123        339.

124    15. Y. Cheng, P. Shen, X. Li, X. Li, K. Chu and Y. Guo, *Sens. Actuators B Chem.*,  
125        2023, **376**, 132979.

126
